# Supplementary material for: HIV-related data among key populations to inform evidence-based responses: protocol of a systematic review
Source: Springer Nature journal article supplement (doi:10.1186/s13643-018-0894-3), 2018-12-01
Supplement: MOESM2 [file 16312214]

# KEY POPULATIONS DATA REPOSITORY

Unique ID [XXX-XXX-XXX-##] \_\_\_\_\_

First three letters of first author last name

Last three letters of journal

Last three letters of of title

Year

(OR "REPORT", 3 letter country abbreviation, year)

e.g. REPORTAFG11

---

---

## OVERALL STUDY DETAILS

Article file upload

Web link \_\_\_\_\_

Title \_\_\_\_\_

First name (first author) \_\_\_\_\_

Last name (first author) \_\_\_\_\_

Year of publication \_\_\_\_\_

Cohort ID (##-XXX-XXX-#####) \_\_\_\_\_

YEAR OF PUB (##)

POPULATION (XXX) [FSW, MSM, PWU, TRA, INC]

COUNTRY ABBREV (XXX) or "MUL"

SAMPLES SIZE (#####)

Journal name (full)/Source \_\_\_\_\_

Primary focus on quantitative data?

- Quantitative  
 Qualitative  
 Modeling

Type of study/document

- Cross-sectional  
 Longitudinal/cohort  
 RCT  
 Review/Systematic review  
 Other

## CROSS-SECTIONAL

Cross-sectional (Total sample size)

\_\_\_\_\_

Cross-sectional (Year study was conducted)

\_\_\_\_\_

Cross-sectional (Recruitment Method)

- Census  
 Probability sampling  
 Respondent driven sampling  
 Time-Location Sampling/Venue-based sampling  
 Snowball sampling  
 Clinic/Facility-based sampling  
 Outreach sampling  
 Other

Specify (if other)

\_\_\_\_\_

Cross-sectional (Notes)

\_\_\_\_\_

## LONGITUDINAL

Longitudinal (Total sample size)

\_\_\_\_\_

Longitudinal (Year of study start)

\_\_\_\_\_

Longitudinal (Year of study end)

\_\_\_\_\_

Longitudinal (Frequency of study visits)

- Daily  
 Weekly  
 Biweekly  
 Monthly  
 Every 3 months  
 Every 6 months  
 Annual

Longitudinal (Recruitment method)

- Census  
 Probability sampling  
 Respondent driven sampling  
 Time-Location Sampling/Venue-based sampling  
 Snowball sampling  
 Clinic/Facility-based sampling  
 Outreach sampling  
 Other

Specify (if other)

\_\_\_\_\_

Longitudinal (Notes)

\_\_\_\_\_

**RANDOMIZED CONTROLLED TRIAL**

RCT (Sample size of control group)

\_\_\_\_\_

RCT (Sample size of intervention group)

\_\_\_\_\_

RCT (Intervention)

\_\_\_\_\_

RCT (Year of study start)

\_\_\_\_\_

RCT (Year of study end)

\_\_\_\_\_

RCT (Frequency of study visits)

- Daily
- Weekly
- Biweekly
- Monthly
- Every 3 months
- Every 6 months
- Annual

RCT (Recruitment method)

- Census
- Probability sampling
- Respondent driven sampling
- Time-Location Sampling/Venue-based sampling
- Snowball sampling
- Clinic/Facility-based sampling
- Outreach sampling
- Other

Specify (if other)

\_\_\_\_\_

RCT (Notes)

\_\_\_\_\_

**SYSTEMATIC REVIEW/REVIEW**

Systematic Review (Total sample size)

\_\_\_\_\_

Systematic Review (Number of studies included)

\_\_\_\_\_

Systematic Review (Year of study inclusion start, publication date)

\_\_\_\_\_

Systematic Review (Year of study inclusion end, publication date)

\_\_\_\_\_

Systematic Review (Meta-analysis conducted)

- Yes
- No

Systematic Review (Notes)

\_\_\_\_\_

Other study type, specify

\_\_\_\_\_

Region of interest

- Worldwide
- Eastern Africa
- Middle Africa
- Northern Africa
- Southern Africa
- Western Africa
- The Carribean
- Central America
- South America
- Northern America
- Asia
- Europe
- Middle East
- Oceania

Number of countries represented in article

---

Country 1:

- Afghanistan
- Albania
- Algeria
- Andorra
- Angola
- Antigua and Barbuda
- Argentina
- Armenia
- Aruba
- Australia
- Austria
- Azerbaijan
- Bahamas
- Bahrain
- Bangladesh
- Barbados
- Belarus
- Belgium
- Belize
- Benin
- Bhutan
- Bolivia
- Bosnia and Herzegovina
- Botswana
- Brazil
- Brunei
- Bulgaria
- Burkina Faso
- Burma
- Burundi
- Cambodia
- Cameroon
- Canada
- Cabo Verde
- Central African Republic
- Chad
- Chile
- China
- Colombia
- Comoros
- Republic of Congo
- Democratic Republic of Congo
- Costa Rica
- Cote d'Ivoire
- Croatia
- Cuba
- Curacao
- Cyprus
- Czechia
- Denmark
- Djibouti
- Dominica
- Dominican Republic
- Ecuador
- Egypt
- El Salvador
- Equatorial Guinea
- Eritrea
- Estonia
- Ethiopia
- Fiji
- Finland
- France
- Gabon
- The Gambia
- Georgia
- Germany
- Ghana
- Greece
- Grenada

- Guatemala
- Guinea
- Guinea-Bissau
- Guyana
- Haiti
- Holy See
- Honduras
- Hong Kong
- Hungary
- Iceland
- India
- Indonesia
- Iran
- Iraq
- Ireland
- Israel
- Italy
- Jamaica
- Japan
- Jordan
- Kazakhstan
- Kenya
- Kiribati
- North Korea
- South Korea
- Kosovo
- Kuwait
- Kyrgyzstan
- Laos
- Latvia
- Lebanon
- Lesotho
- Liberia
- Libya
- Liechtenstein
- Lithuania
- Luxembourg
- Macau
- Macedonia
- Madagascar
- Malawi
- Malaysia
- Maldives
- Mali
- Malta
- Marshall Islands
- Mauritania
- Mauritius
- Mexico
- Micronesia
- Moldova
- Monaco
- Mongolia
- Montenegro
- Morocco
- Mozambique
- Namibia
- Nauru
- Nepal
- Netherlands
- New Zealand
- Nicaragua
- Niger
- Nigeria
- North Korea
- Norway
- Oman
- Pakistan
- Palau
- Palestinian Territories
- Panama

- Papua New Guinea
- Paraguay
- Peru
- Philippines
- Poland
- Portugal
- Qatar
- Romania
- Russia
- Rwanda
- Saint Kitts and Nevis
- Saint Lucia
- Saint Vincent and the Grenadines
- Samoa
- San Marino
- Sao Tome and Principe
- Saudi Arabia
- Senegal
- Serbia
- Seychelles
- Sierra Leone
- Singapore
- Sint Maarten
- Slovakia
- Slovenia
- Solomon Islands
- Somalia
- South Africa
- South Korea
- South Sudan
- Spain
- Sri Lanka
- Sudan
- Suriname
- Swaziland
- Sweden
- Switzerland
- Syria
- Taiwan
- Tajikistan
- Tanzania
- Thailand
- Timor-Leste
- Togo
- Tonga
- Trinidad and Tobago
- Tunisia
- Turkey
- Turkmenistan
- Tuvalu
- Uganda
- Ukraine
- United Arab Emirates
- United Kingdom
- United States of America
- Uruguay
- Uzbekistan
- Vanuatu
- Venezuela
- Vietnam
- Yemen
- Zambia
- Zimbabwe

Country 2:

- Afghanistan
- Albania
- Algeria
- Andorra
- Angola
- Antigua and Barbuda
- Argentina
- Armenia
- Aruba
- Australia
- Austria
- Azerbaijan
- Bahamas
- Bahrain
- Bangladesh
- Barbados
- Belarus
- Belgium
- Belize
- Benin
- Bhutan
- Bolivia
- Bosnia and Herzegovina
- Botswana
- Brazil
- Brunei
- Bulgaria
- Burkina Faso
- Burma
- Burundi
- Cambodia
- Cameroon
- Canada
- Cabo Verde
- Central African Republic
- Chad
- Chile
- China
- Colombia
- Comoros
- Republic of Congo
- Democratic Republic of Congo
- Costa Rica
- Cote d'Ivoire
- Croatia
- Cuba
- Curacao
- Cyprus
- Czechia
- Denmark
- Djibouti
- Dominica
- Dominican Republic
- Ecuador
- Egypt
- El Salvador
- Equatorial Guinea
- Eritrea
- Estonia
- Ethiopia
- Fiji
- Finland
- France
- Gabon
- The Gambia
- Georgia
- Germany
- Ghana
- Greece
- Grenada



- Guatemala
- Guinea
- Guinea-Bissau
- Guyana
- Haiti
- Holy See
- Honduras
- Hong Kong
- Hungary
- Iceland
- India
- Indonesia
- Iran
- Iraq
- Ireland
- Israel
- Italy
- Jamaica
- Japan
- Jordan
- Kazakhstan
- Kenya
- Kiribati
- North Korea
- South Korea
- Kosovo
- Kuwait
- Kyrgyzstan
- Laos
- Latvia
- Lebanon
- Lesotho
- Liberia
- Libya
- Liechtenstein
- Lithuania
- Luxembourg
- Macau
- Macedonia
- Madagascar
- Malawi
- Malaysia
- Maldives
- Mali
- Malta
- Marshall Islands
- Mauritania
- Mauritius
- Mexico
- Micronesia
- Moldova
- Monaco
- Mongolia
- Montenegro
- Morocco
- Mozambique
- Namibia
- Nauru
- Nepal
- Netherlands
- New Zealand
- Nicaragua
- Niger
- Nigeria
- North Korea
- Norway
- Oman
- Pakistan
- Palau
- Palestinian Territories
- Panama

- Papua New Guinea
- Paraguay
- Peru
- Philippines
- Poland
- Portugal
- Qatar
- Romania
- Russia
- Rwanda
- Saint Kitts and Nevis
- Saint Lucia
- Saint Vincent and the Grenadines
- Samoa
- San Marino
- Sao Tome and Principe
- Saudi Arabia
- Senegal
- Serbia
- Seychelles
- Sierra Leone
- Singapore
- Sint Maarten
- Slovakia
- Slovenia
- Solomon Islands
- Somalia
- South Africa
- South Korea
- South Sudan
- Spain
- Sri Lanka
- Sudan
- Suriname
- Swaziland
- Sweden
- Switzerland
- Syria
- Taiwan
- Tajikistan
- Tanzania
- Thailand
- Timor-Leste
- Togo
- Tonga
- Trinidad and Tobago
- Tunisia
- Turkey
- Turkmenistan
- Tuvalu
- Uganda
- Ukraine
- United Arab Emirates
- United Kingdom
- United States of America
- Uruguay
- Uzbekistan
- Vanuatu
- Venezuela
- Vietnam
- Yemen
- Zambia
- Zimbabwe

Country 3:

- Afghanistan
- Albania
- Algeria
- Andorra
- Angola
- Antigua and Barbuda
- Argentina
- Armenia
- Aruba
- Australia
- Austria
- Azerbaijan
- Bahamas
- Bahrain
- Bangladesh
- Barbados
- Belarus
- Belgium
- Belize
- Benin
- Bhutan
- Bolivia
- Bosnia and Herzegovina
- Botswana
- Brazil
- Brunei
- Bulgaria
- Burkina Faso
- Burma
- Burundi
- Cambodia
- Cameroon
- Canada
- Cabo Verde
- Central African Republic
- Chad
- Chile
- China
- Colombia
- Comoros
- Republic of Congo
- Democratic Republic of Congo
- Costa Rica
- Cote d'Ivoire
- Croatia
- Cuba
- Curacao
- Cyprus
- Czechia
- Denmark
- Djibouti
- Dominica
- Dominican Republic
- Ecuador
- Egypt
- El Salvador
- Equatorial Guinea
- Eritrea
- Estonia
- Ethiopia
- Fiji
- Finland
- France
- Gabon
- The Gambia
- Georgia
- Germany
- Ghana
- Greece
- Grenada

- Guatemala
- Guinea
- Guinea-Bissau
- Guyana
- Haiti
- Holy See
- Honduras
- Hong Kong
- Hungary
- Iceland
- India
- Indonesia
- Iran
- Iraq
- Ireland
- Israel
- Italy
- Jamaica
- Japan
- Jordan
- Kazakhstan
- Kenya
- Kiribati
- North Korea
- South Korea
- Kosovo
- Kuwait
- Kyrgyzstan
- Laos
- Latvia
- Lebanon
- Lesotho
- Liberia
- Libya
- Liechtenstein
- Lithuania
- Luxembourg
- Macau
- Macedonia
- Madagascar
- Malawi
- Malaysia
- Maldives
- Mali
- Malta
- Marshall Islands
- Mauritania
- Mauritius
- Mexico
- Micronesia
- Moldova
- Monaco
- Mongolia
- Montenegro
- Morocco
- Mozambique
- Namibia
- Nauru
- Nepal
- Netherlands
- New Zealand
- Nicaragua
- Niger
- Nigeria
- North Korea
- Norway
- Oman
- Pakistan
- Palau
- Palestinian Territories
- Panama

- Papua New Guinea
- Paraguay
- Peru
- Philippines
- Poland
- Portugal
- Qatar
- Romania
- Russia
- Rwanda
- Saint Kitts and Nevis
- Saint Lucia
- Saint Vincent and the Grenadines
- Samoa
- San Marino
- Sao Tome and Principe
- Saudi Arabia
- Senegal
- Serbia
- Seychelles
- Sierra Leone
- Singapore
- Sint Maarten
- Slovakia
- Slovenia
- Solomon Islands
- Somalia
- South Africa
- South Korea
- South Sudan
- Spain
- Sri Lanka
- Sudan
- Suriname
- Swaziland
- Sweden
- Switzerland
- Syria
- Taiwan
- Tajikistan
- Tanzania
- Thailand
- Timor-Leste
- Togo
- Tonga
- Trinidad and Tobago
- Tunisia
- Turkey
- Turkmenistan
- Tuvalu
- Uganda
- Ukraine
- United Arab Emirates
- United Kingdom
- United States of America
- Uruguay
- Uzbekistan
- Vanuatu
- Venezuela
- Vietnam
- Yemen
- Zambia
- Zimbabwe

Country 4:

- Afghanistan
- Albania
- Algeria
- Andorra
- Angola
- Antigua and Barbuda
- Argentina
- Armenia
- Aruba
- Australia
- Austria
- Azerbaijan
- Bahamas
- Bahrain
- Bangladesh
- Barbados
- Belarus
- Belgium
- Belize
- Benin
- Bhutan
- Bolivia
- Bosnia and Herzegovina
- Botswana
- Brazil
- Brunei
- Bulgaria
- Burkina Faso
- Burma
- Burundi
- Cambodia
- Cameroon
- Canada
- Cabo Verde
- Central African Republic
- Chad
- Chile
- China
- Colombia
- Comoros
- Republic of Congo
- Democratic Republic of Congo
- Costa Rica
- Cote d'Ivoire
- Croatia
- Cuba
- Curacao
- Cyprus
- Czechia
- Denmark
- Djibouti
- Dominica
- Dominican Republic
- Ecuador
- Egypt
- El Salvador
- Equatorial Guinea
- Eritrea
- Estonia
- Ethiopia
- Fiji
- Finland
- France
- Gabon
- The Gambia
- Georgia
- Germany
- Ghana
- Greece
- Grenada

- Guatemala
- Guinea
- Guinea-Bissau
- Guyana
- Haiti
- Holy See
- Honduras
- Hong Kong
- Hungary
- Iceland
- India
- Indonesia
- Iran
- Iraq
- Ireland
- Israel
- Italy
- Jamaica
- Japan
- Jordan
- Kazakhstan
- Kenya
- Kiribati
- North Korea
- South Korea
- Kosovo
- Kuwait
- Kyrgyzstan
- Laos
- Latvia
- Lebanon
- Lesotho
- Liberia
- Libya
- Liechtenstein
- Lithuania
- Luxembourg
- Macau
- Macedonia
- Madagascar
- Malawi
- Malaysia
- Maldives
- Mali
- Malta
- Marshall Islands
- Mauritania
- Mauritius
- Mexico
- Micronesia
- Moldova
- Monaco
- Mongolia
- Montenegro
- Morocco
- Mozambique
- Namibia
- Nauru
- Nepal
- Netherlands
- New Zealand
- Nicaragua
- Niger
- Nigeria
- North Korea
- Norway
- Oman
- Pakistan
- Palau
- Palestinian Territories
- Panama

- Papua New Guinea
- Paraguay
- Peru
- Philippines
- Poland
- Portugal
- Qatar
- Romania
- Russia
- Rwanda
- Saint Kitts and Nevis
- Saint Lucia
- Saint Vincent and the Grenadines
- Samoa
- San Marino
- Sao Tome and Principe
- Saudi Arabia
- Senegal
- Serbia
- Seychelles
- Sierra Leone
- Singapore
- Sint Maarten
- Slovakia
- Slovenia
- Solomon Islands
- Somalia
- South Africa
- South Korea
- South Sudan
- Spain
- Sri Lanka
- Sudan
- Suriname
- Swaziland
- Sweden
- Switzerland
- Syria
- Taiwan
- Tajikistan
- Tanzania
- Thailand
- Timor-Leste
- Togo
- Tonga
- Trinidad and Tobago
- Tunisia
- Turkey
- Turkmenistan
- Tuvalu
- Uganda
- Ukraine
- United Arab Emirates
- United Kingdom
- United States of America
- Uruguay
- Uzbekistan
- Vanuatu
- Venezuela
- Vietnam
- Yemen
- Zambia
- Zimbabwe



Country 5:

- Afghanistan
- Albania
- Algeria
- Andorra
- Angola
- Antigua and Barbuda
- Argentina
- Armenia
- Aruba
- Australia
- Austria
- Azerbaijan
- Bahamas
- Bahrain
- Bangladesh
- Barbados
- Belarus
- Belgium
- Belize
- Benin
- Bhutan
- Bolivia
- Bosnia and Herzegovina
- Botswana
- Brazil
- Brunei
- Bulgaria
- Burkina Faso
- Burma
- Burundi
- Cambodia
- Cameroon
- Canada
- Cabo Verde
- Central African Republic
- Chad
- Chile
- China
- Colombia
- Comoros
- Republic of Congo
- Democratic Republic of Congo
- Costa Rica
- Cote d'Ivoire
- Croatia
- Cuba
- Curacao
- Cyprus
- Czechia
- Denmark
- Djibouti
- Dominica
- Dominican Republic
- Ecuador
- Egypt
- El Salvador
- Equatorial Guinea
- Eritrea
- Estonia
- Ethiopia
- Fiji
- Finland
- France
- Gabon
- The Gambia
- Georgia
- Germany
- Ghana
- Greece
- Grenada

- Guatemala
- Guinea
- Guinea-Bissau
- Guyana
- Haiti
- Holy See
- Honduras
- Hong Kong
- Hungary
- Iceland
- India
- Indonesia
- Iran
- Iraq
- Ireland
- Israel
- Italy
- Jamaica
- Japan
- Jordan
- Kazakhstan
- Kenya
- Kiribati
- North Korea
- South Korea
- Kosovo
- Kuwait
- Kyrgyzstan
- Laos
- Latvia
- Lebanon
- Lesotho
- Liberia
- Libya
- Liechtenstein
- Lithuania
- Luxembourg
- Macau
- Macedonia
- Madagascar
- Malawi
- Malaysia
- Maldives
- Mali
- Malta
- Marshall Islands
- Mauritania
- Mauritius
- Mexico
- Micronesia
- Moldova
- Monaco
- Mongolia
- Montenegro
- Morocco
- Mozambique
- Namibia
- Nauru
- Nepal
- Netherlands
- New Zealand
- Nicaragua
- Niger
- Nigeria
- North Korea
- Norway
- Oman
- Pakistan
- Palau
- Palestinian Territories
- Panama

- Papua New Guinea
- Paraguay
- Peru
- Philippines
- Poland
- Portugal
- Qatar
- Romania
- Russia
- Rwanda
- Saint Kitts and Nevis
- Saint Lucia
- Saint Vincent and the Grenadines
- Samoa
- San Marino
- Sao Tome and Principe
- Saudi Arabia
- Senegal
- Serbia
- Seychelles
- Sierra Leone
- Singapore
- Sint Maarten
- Slovakia
- Slovenia
- Solomon Islands
- Somalia
- South Africa
- South Korea
- South Sudan
- Spain
- Sri Lanka
- Sudan
- Suriname
- Swaziland
- Sweden
- Switzerland
- Syria
- Taiwan
- Tajikistan
- Tanzania
- Thailand
- Timor-Leste
- Togo
- Tonga
- Trinidad and Tobago
- Tunisia
- Turkey
- Turkmenistan
- Tuvalu
- Uganda
- Ukraine
- United Arab Emirates
- United Kingdom
- United States of America
- Uruguay
- Uzbekistan
- Vanuatu
- Venezuela
- Vietnam
- Yemen
- Zambia
- Zimbabwe

Country 6:

- Afghanistan
- Albania
- Algeria
- Andorra
- Angola
- Antigua and Barbuda
- Argentina
- Armenia
- Aruba
- Australia
- Austria
- Azerbaijan
- Bahamas
- Bahrain
- Bangladesh
- Barbados
- Belarus
- Belgium
- Belize
- Benin
- Bhutan
- Bolivia
- Bosnia and Herzegovina
- Botswana
- Brazil
- Brunei
- Bulgaria
- Burkina Faso
- Burma
- Burundi
- Cambodia
- Cameroon
- Canada
- Cabo Verde
- Central African Republic
- Chad
- Chile
- China
- Colombia
- Comoros
- Republic of Congo
- Democratic Republic of Congo
- Costa Rica
- Cote d'Ivoire
- Croatia
- Cuba
- Curacao
- Cyprus
- Czechia
- Denmark
- Djibouti
- Dominica
- Dominican Republic
- Ecuador
- Egypt
- El Salvador
- Equatorial Guinea
- Eritrea
- Estonia
- Ethiopia
- Fiji
- Finland
- France
- Gabon
- The Gambia
- Georgia
- Germany
- Ghana
- Greece
- Grenada

- Guatemala
- Guinea
- Guinea-Bissau
- Guyana
- Haiti
- Holy See
- Honduras
- Hong Kong
- Hungary
- Iceland
- India
- Indonesia
- Iran
- Iraq
- Ireland
- Israel
- Italy
- Jamaica
- Japan
- Jordan
- Kazakhstan
- Kenya
- Kiribati
- North Korea
- South Korea
- Kosovo
- Kuwait
- Kyrgyzstan
- Laos
- Latvia
- Lebanon
- Lesotho
- Liberia
- Libya
- Liechtenstein
- Lithuania
- Luxembourg
- Macau
- Macedonia
- Madagascar
- Malawi
- Malaysia
- Maldives
- Mali
- Malta
- Marshall Islands
- Mauritania
- Mauritius
- Mexico
- Micronesia
- Moldova
- Monaco
- Mongolia
- Montenegro
- Morocco
- Mozambique
- Namibia
- Nauru
- Nepal
- Netherlands
- New Zealand
- Nicaragua
- Niger
- Nigeria
- North Korea
- Norway
- Oman
- Pakistan
- Palau
- Palestinian Territories
- Panama

- Papua New Guinea
- Paraguay
- Peru
- Philippines
- Poland
- Portugal
- Qatar
- Romania
- Russia
- Rwanda
- Saint Kitts and Nevis
- Saint Lucia
- Saint Vincent and the Grenadines
- Samoa
- San Marino
- Sao Tome and Principe
- Saudi Arabia
- Senegal
- Serbia
- Seychelles
- Sierra Leone
- Singapore
- Sint Maarten
- Slovakia
- Slovenia
- Solomon Islands
- Somalia
- South Africa
- South Korea
- South Sudan
- Spain
- Sri Lanka
- Sudan
- Suriname
- Swaziland
- Sweden
- Switzerland
- Syria
- Taiwan
- Tajikistan
- Tanzania
- Thailand
- Timor-Leste
- Togo
- Tonga
- Trinidad and Tobago
- Tunisia
- Turkey
- Turkmenistan
- Tuvalu
- Uganda
- Ukraine
- United Arab Emirates
- United Kingdom
- United States of America
- Uruguay
- Uzbekistan
- Vanuatu
- Venezuela
- Vietnam
- Yemen
- Zambia
- Zimbabwe

Country 7:

- Afghanistan
- Albania
- Algeria
- Andorra
- Angola
- Antigua and Barbuda
- Argentina
- Armenia
- Aruba
- Australia
- Austria
- Azerbaijan
- Bahamas
- Bahrain
- Bangladesh
- Barbados
- Belarus
- Belgium
- Belize
- Benin
- Bhutan
- Bolivia
- Bosnia and Herzegovina
- Botswana
- Brazil
- Brunei
- Bulgaria
- Burkina Faso
- Burma
- Burundi
- Cambodia
- Cameroon
- Canada
- Cabo Verde
- Central African Republic
- Chad
- Chile
- China
- Colombia
- Comoros
- Republic of Congo
- Democratic Republic of Congo
- Costa Rica
- Cote d'Ivoire
- Croatia
- Cuba
- Curacao
- Cyprus
- Czechia
- Denmark
- Djibouti
- Dominica
- Dominican Republic
- Ecuador
- Egypt
- El Salvador
- Equatorial Guinea
- Eritrea
- Estonia
- Ethiopia
- Fiji
- Finland
- France
- Gabon
- The Gambia
- Georgia
- Germany
- Ghana
- Greece
- Grenada

- Guatemala
- Guinea
- Guinea-Bissau
- Guyana
- Haiti
- Holy See
- Honduras
- Hong Kong
- Hungary
- Iceland
- India
- Indonesia
- Iran
- Iraq
- Ireland
- Israel
- Italy
- Jamaica
- Japan
- Jordan
- Kazakhstan
- Kenya
- Kiribati
- North Korea
- South Korea
- Kosovo
- Kuwait
- Kyrgyzstan
- Laos
- Latvia
- Lebanon
- Lesotho
- Liberia
- Libya
- Liechtenstein
- Lithuania
- Luxembourg
- Macau
- Macedonia
- Madagascar
- Malawi
- Malaysia
- Maldives
- Mali
- Malta
- Marshall Islands
- Mauritania
- Mauritius
- Mexico
- Micronesia
- Moldova
- Monaco
- Mongolia
- Montenegro
- Morocco
- Mozambique
- Namibia
- Nauru
- Nepal
- Netherlands
- New Zealand
- Nicaragua
- Niger
- Nigeria
- North Korea
- Norway
- Oman
- Pakistan
- Palau
- Palestinian Territories
- Panama



- Papua New Guinea
- Paraguay
- Peru
- Philippines
- Poland
- Portugal
- Qatar
- Romania
- Russia
- Rwanda
- Saint Kitts and Nevis
- Saint Lucia
- Saint Vincent and the Grenadines
- Samoa
- San Marino
- Sao Tome and Principe
- Saudi Arabia
- Senegal
- Serbia
- Seychelles
- Sierra Leone
- Singapore
- Sint Maarten
- Slovakia
- Slovenia
- Solomon Islands
- Somalia
- South Africa
- South Korea
- South Sudan
- Spain
- Sri Lanka
- Sudan
- Suriname
- Swaziland
- Sweden
- Switzerland
- Syria
- Taiwan
- Tajikistan
- Tanzania
- Thailand
- Timor-Leste
- Togo
- Tonga
- Trinidad and Tobago
- Tunisia
- Turkey
- Turkmenistan
- Tuvalu
- Uganda
- Ukraine
- United Arab Emirates
- United Kingdom
- United States of America
- Uruguay
- Uzbekistan
- Vanuatu
- Venezuela
- Vietnam
- Yemen
- Zambia
- Zimbabwe

Country 8:

- Afghanistan
- Albania
- Algeria
- Andorra
- Angola
- Antigua and Barbuda
- Argentina
- Armenia
- Aruba
- Australia
- Austria
- Azerbaijan
- Bahamas
- Bahrain
- Bangladesh
- Barbados
- Belarus
- Belgium
- Belize
- Benin
- Bhutan
- Bolivia
- Bosnia and Herzegovina
- Botswana
- Brazil
- Brunei
- Bulgaria
- Burkina Faso
- Burma
- Burundi
- Cambodia
- Cameroon
- Canada
- Cabo Verde
- Central African Republic
- Chad
- Chile
- China
- Colombia
- Comoros
- Republic of Congo
- Democratic Republic of Congo
- Costa Rica
- Cote d'Ivoire
- Croatia
- Cuba
- Curacao
- Cyprus
- Czechia
- Denmark
- Djibouti
- Dominica
- Dominican Republic
- Ecuador
- Egypt
- El Salvador
- Equatorial Guinea
- Eritrea
- Estonia
- Ethiopia
- Fiji
- Finland
- France
- Gabon
- The Gambia
- Georgia
- Germany
- Ghana
- Greece
- Grenada

- Guatemala
- Guinea
- Guinea-Bissau
- Guyana
- Haiti
- Holy See
- Honduras
- Hong Kong
- Hungary
- Iceland
- India
- Indonesia
- Iran
- Iraq
- Ireland
- Israel
- Italy
- Jamaica
- Japan
- Jordan
- Kazakhstan
- Kenya
- Kiribati
- North Korea
- South Korea
- Kosovo
- Kuwait
- Kyrgyzstan
- Laos
- Latvia
- Lebanon
- Lesotho
- Liberia
- Libya
- Liechtenstein
- Lithuania
- Luxembourg
- Macau
- Macedonia
- Madagascar
- Malawi
- Malaysia
- Maldives
- Mali
- Malta
- Marshall Islands
- Mauritania
- Mauritius
- Mexico
- Micronesia
- Moldova
- Monaco
- Mongolia
- Montenegro
- Morocco
- Mozambique
- Namibia
- Nauru
- Nepal
- Netherlands
- New Zealand
- Nicaragua
- Niger
- Nigeria
- North Korea
- Norway
- Oman
- Pakistan
- Palau
- Palestinian Territories
- Panama

- Papua New Guinea
- Paraguay
- Peru
- Philippines
- Poland
- Portugal
- Qatar
- Romania
- Russia
- Rwanda
- Saint Kitts and Nevis
- Saint Lucia
- Saint Vincent and the Grenadines
- Samoa
- San Marino
- Sao Tome and Principe
- Saudi Arabia
- Senegal
- Serbia
- Seychelles
- Sierra Leone
- Singapore
- Sint Maarten
- Slovakia
- Slovenia
- Solomon Islands
- Somalia
- South Africa
- South Korea
- South Sudan
- Spain
- Sri Lanka
- Sudan
- Suriname
- Swaziland
- Sweden
- Switzerland
- Syria
- Taiwan
- Tajikistan
- Tanzania
- Thailand
- Timor-Leste
- Togo
- Tonga
- Trinidad and Tobago
- Tunisia
- Turkey
- Turkmenistan
- Tuvalu
- Uganda
- Ukraine
- United Arab Emirates
- United Kingdom
- United States of America
- Uruguay
- Uzbekistan
- Vanuatu
- Venezuela
- Vietnam
- Yemen
- Zambia
- Zimbabwe

Country 9:

- Afghanistan
- Albania
- Algeria
- Andorra
- Angola
- Antigua and Barbuda
- Argentina
- Armenia
- Aruba
- Australia
- Austria
- Azerbaijan
- Bahamas
- Bahrain
- Bangladesh
- Barbados
- Belarus
- Belgium
- Belize
- Benin
- Bhutan
- Bolivia
- Bosnia and Herzegovina
- Botswana
- Brazil
- Brunei
- Bulgaria
- Burkina Faso
- Burma
- Burundi
- Cambodia
- Cameroon
- Canada
- Cabo Verde
- Central African Republic
- Chad
- Chile
- China
- Colombia
- Comoros
- Republic of Congo
- Democratic Republic of Congo
- Costa Rica
- Cote d'Ivoire
- Croatia
- Cuba
- Curacao
- Cyprus
- Czechia
- Denmark
- Djibouti
- Dominica
- Dominican Republic
- Ecuador
- Egypt
- El Salvador
- Equatorial Guinea
- Eritrea
- Estonia
- Ethiopia
- Fiji
- Finland
- France
- Gabon
- The Gambia
- Georgia
- Germany
- Ghana
- Greece
- Grenada

- Guatemala
- Guinea
- Guinea-Bissau
- Guyana
- Haiti
- Holy See
- Honduras
- Hong Kong
- Hungary
- Iceland
- India
- Indonesia
- Iran
- Iraq
- Ireland
- Israel
- Italy
- Jamaica
- Japan
- Jordan
- Kazakhstan
- Kenya
- Kiribati
- North Korea
- South Korea
- Kosovo
- Kuwait
- Kyrgyzstan
- Laos
- Latvia
- Lebanon
- Lesotho
- Liberia
- Libya
- Liechtenstein
- Lithuania
- Luxembourg
- Macau
- Macedonia
- Madagascar
- Malawi
- Malaysia
- Maldives
- Mali
- Malta
- Marshall Islands
- Mauritania
- Mauritius
- Mexico
- Micronesia
- Moldova
- Monaco
- Mongolia
- Montenegro
- Morocco
- Mozambique
- Namibia
- Nauru
- Nepal
- Netherlands
- New Zealand
- Nicaragua
- Niger
- Nigeria
- North Korea
- Norway
- Oman
- Pakistan
- Palau
- Palestinian Territories
- Panama

- Papua New Guinea
- Paraguay
- Peru
- Philippines
- Poland
- Portugal
- Qatar
- Romania
- Russia
- Rwanda
- Saint Kitts and Nevis
- Saint Lucia
- Saint Vincent and the Grenadines
- Samoa
- San Marino
- Sao Tome and Principe
- Saudi Arabia
- Senegal
- Serbia
- Seychelles
- Sierra Leone
- Singapore
- Sint Maarten
- Slovakia
- Slovenia
- Solomon Islands
- Somalia
- South Africa
- South Korea
- South Sudan
- Spain
- Sri Lanka
- Sudan
- Suriname
- Swaziland
- Sweden
- Switzerland
- Syria
- Taiwan
- Tajikistan
- Tanzania
- Thailand
- Timor-Leste
- Togo
- Tonga
- Trinidad and Tobago
- Tunisia
- Turkey
- Turkmenistan
- Tuvalu
- Uganda
- Ukraine
- United Arab Emirates
- United Kingdom
- United States of America
- Uruguay
- Uzbekistan
- Vanuatu
- Venezuela
- Vietnam
- Yemen
- Zambia
- Zimbabwe

Country 10:

- Afghanistan
- Albania
- Algeria
- Andorra
- Angola
- Antigua and Barbuda
- Argentina
- Armenia
- Aruba
- Australia
- Austria
- Azerbaijan
- Bahamas
- Bahrain
- Bangladesh
- Barbados
- Belarus
- Belgium
- Belize
- Benin
- Bhutan
- Bolivia
- Bosnia and Herzegovina
- Botswana
- Brazil
- Brunei
- Bulgaria
- Burkina Faso
- Burma
- Burundi
- Cambodia
- Cameroon
- Canada
- Cabo Verde
- Central African Republic
- Chad
- Chile
- China
- Colombia
- Comoros
- Republic of Congo
- Democratic Republic of Congo
- Costa Rica
- Cote d'Ivoire
- Croatia
- Cuba
- Curacao
- Cyprus
- Czechia
- Denmark
- Djibouti
- Dominica
- Dominican Republic
- Ecuador
- Egypt
- El Salvador
- Equatorial Guinea
- Eritrea
- Estonia
- Ethiopia
- Fiji
- Finland
- France
- Gabon
- The Gambia
- Georgia
- Germany
- Ghana
- Greece
- Grenada



- Guatemala
- Guinea
- Guinea-Bissau
- Guyana
- Haiti
- Holy See
- Honduras
- Hong Kong
- Hungary
- Iceland
- India
- Indonesia
- Iran
- Iraq
- Ireland
- Israel
- Italy
- Jamaica
- Japan
- Jordan
- Kazakhstan
- Kenya
- Kiribati
- North Korea
- South Korea
- Kosovo
- Kuwait
- Kyrgyzstan
- Laos
- Latvia
- Lebanon
- Lesotho
- Liberia
- Libya
- Liechtenstein
- Lithuania
- Luxembourg
- Macau
- Macedonia
- Madagascar
- Malawi
- Malaysia
- Maldives
- Mali
- Malta
- Marshall Islands
- Mauritania
- Mauritius
- Mexico
- Micronesia
- Moldova
- Monaco
- Mongolia
- Montenegro
- Morocco
- Mozambique
- Namibia
- Nauru
- Nepal
- Netherlands
- New Zealand
- Nicaragua
- Niger
- Nigeria
- North Korea
- Norway
- Oman
- Pakistan
- Palau
- Palestinian Territories
- Panama

- Papua New Guinea
- Paraguay
- Peru
- Philippines
- Poland
- Portugal
- Qatar
- Romania
- Russia
- Rwanda
- Saint Kitts and Nevis
- Saint Lucia
- Saint Vincent and the Grenadines
- Samoa
- San Marino
- Sao Tome and Principe
- Saudi Arabia
- Senegal
- Serbia
- Seychelles
- Sierra Leone
- Singapore
- Sint Maarten
- Slovakia
- Slovenia
- Solomon Islands
- Somalia
- South Africa
- South Korea
- South Sudan
- Spain
- Sri Lanka
- Sudan
- Suriname
- Swaziland
- Sweden
- Switzerland
- Syria
- Taiwan
- Tajikistan
- Tanzania
- Thailand
- Timor-Leste
- Togo
- Tonga
- Trinidad and Tobago
- Tunisia
- Turkey
- Turkmenistan
- Tuvalu
- Uganda
- Ukraine
- United Arab Emirates
- United Kingdom
- United States of America
- Uruguay
- Uzbekistan
- Vanuatu
- Venezuela
- Vietnam
- Yemen
- Zambia
- Zimbabwe

Number of populations of interest

---

Population of interest 1:

- Female Sex Workers
- Gay men and other men who have sex with men
- People who use drugs
- Transgender people
- Incarcerated populations

Population of interest 2:

- Female Sex Workers
- Gay men and other men who have sex with men
- People who use drugs
- Transgender people
- Incarcerated populations

Population of interest 3:

- Female Sex Workers
- Gay men and other men who have sex with men
- People who use drugs
- Transgender people
- Incarcerated populations

Population of interest 4:

- Female Sex Workers
- Gay men and other men who have sex with men
- People who use drugs
- Transgender people
- Incarcerated populations

Population of interest 5:

- Female Sex Workers
- Gay men and other men who have sex with men
- People who use drugs
- Transgender people
- Incarcerated populations

---



---

**FEMALE SEX WORKERS**

Sample size of FSW

\_\_\_\_\_

---



---

**BURDEN OF HIV (FSW)**

Prevalence of HIV in sample (count)

\_\_\_\_\_

(FSW)

Prevalence, lower bound of CI - reported

\_\_\_\_\_

(FSW)

Prevalence, upper bound of CI - reported

\_\_\_\_\_

(FSW)

Prevalence, lower bound of CI - calculated

\_\_\_\_\_

(FSW)

Prevalence, upper bound of CI - calculated \_\_\_\_\_

(FSW)

Incidence of HIV in sample (count) \_\_\_\_\_

(FSW)

Incidence, lower bound of CI - reported \_\_\_\_\_

(FSW)

Incidence, upper bound of CI - reported \_\_\_\_\_

(FSW)

Incidence, lower bound of CI - calculated \_\_\_\_\_

(FSW)

Incidence, upper bound of CI - calculated \_\_\_\_\_

(FSW)

Notes, burden of disease \_\_\_\_\_

(FSW)

---

---

**HIV PREVENTION CASCADE**

Prevention cascade denominator (number of HIV negative) \_\_\_\_\_

Number of HIV negative individuals tested for HIV \_\_\_\_\_

(FSW)

Number of HIV negative individuals tested for HIV, lower bound of CI - calculated \_\_\_\_\_

(FSW)

Number of HIV negative individuals tested for HIV, upper bound of CI - calculated \_\_\_\_\_

(FSW)

Number tested negative \_\_\_\_\_

(FSW)

Number tested negative, lower bound of CI -  
calculated \_\_\_\_\_

(FSW)

Number tested negative, upper bound of CI -  
calculated \_\_\_\_\_

(FSW)

Number with knowledge of HIV prevention \_\_\_\_\_

(FSW)

Number with knowledge of HIV prevention, lower bound  
of CI - calculated \_\_\_\_\_

(FSW)

Number with knowledge of HIV prevention, upper bound  
of CI - calculated \_\_\_\_\_

(FSW)

Number who report condom availability \_\_\_\_\_

(FSW)

Number who report condom availability, lower bound of  
CI - calculated \_\_\_\_\_

(FSW)

Number who report condom availability, upper bound of  
CI - calculated \_\_\_\_\_

(FSW)

Number who report PrEP availability \_\_\_\_\_

(FSW)

Number who report PrEP availability, lower bound of  
CI - calculated \_\_\_\_\_

(FSW)

Number who report PrEP availability, upper bound of CI - calculated

\_\_\_\_\_

(FSW)

Notes, prevention cascade

\_\_\_\_\_

(FSW)

---

---

**HIV TREATMENT CASCADE**

Treatment cascade denominator

\_\_\_\_\_

Number tested (ever)

\_\_\_\_\_

(FSW)

Number tested (ever), lower bound of CI - calculated

\_\_\_\_\_

(FSW)

Number tested (ever), upper bound of CI - calculated

\_\_\_\_\_

(FSW)

Number tested in last 12 months

\_\_\_\_\_

(FSW)

Number tested in last 12 months, lower bound of CI - calculated

\_\_\_\_\_

(FSW)

Number tested in last 12 months, upper bound of CI - calculated

\_\_\_\_\_

(FSW)

Number previously diagnosed

\_\_\_\_\_

(FSW)

Number previously diagnosed, lower bound of CI -  
calculated

---

(FSW)

Number previously diagnosed, upper bound of CI -  
calculated

---

(FSW)

Number linked to HIV care

---

(FSW)

Number linked to HIV care, lower bound of CI -  
calculated

---

(FSW)

Number linked to HIV care, upper bound of CI -  
calculated

---

(FSW)

Number retained in care

---

(FSW)

Number retained in care, lower bound of CI -  
calculated

---

(FSW)

Number retained in care, upper bound of CI -  
calculated

---

(FSW)

Number on treatment

---

(FSW)

Number on treatment, lower bound of CI - calculated

---

(FSW)

Number on treatment, upper bound of CI - calculated

---

(FSW)

Number adherent/undetectable

---

(FSW)

Number adherent/undetectable, lower bound of CI - calculated

---

(FSW)

Number adherent/undetectable, upper bound of CI - calculated

---

(FSW)

Notes, treatment cascade

---

(FSW)

---

---

**POPULATION SIZE ESTIMATES**

Size estimate 1

---

(FSW)

Size estimate FSW, lower bound of CI 1

---

Size estimate FSW, upper bound of CI 1

---

Specific region for size estimate 1

---

Method for size estimate 1

- Service Multiplier
- Unique object multiplier
- Capture-recapture
- Network scale-up
- Wisdom of the crowds
- Delphi
- Program estimate
- General population survey
- Mapping and enumeration
- Reverse tracking method
- Literature Review
- Other



Size estimate 2

---

(FSW)

Size estimate FSW, lower bound of CI 2

---

Size estimate FSW, upper bound of CI 2

---

Specific region for size estimate 2

---

Method for size estimate 2

- Service Multiplier
- Unique object multiplier
- Capture-recapture
- Network scale-up
- Wisdom of the crowds
- Delphi
- Program estimate
- General population survey
- Mapping and enumeration
- Reverse tracking method
- Literature Review
- Other

Size estimate 3

---

(FSW)

Size estimate FSW, lower bound of CI 3

---

Size estimate FSW, upper bound of CI 3

---

Specific region for size estimate 3

---

Method for size estimate 3

- Service Multiplier
- Unique object multiplier
- Capture-recapture
- Network scale-up
- Wisdom of the crowds
- Delphi
- Program estimate
- General population survey
- Mapping and enumeration
- Reverse tracking method
- Literature Review
- Other

Size estimate 4

---

(FSW)

Size estimate FSW, lower bound of CI 4

---

Size estimate FSW, upper bound of CI 4

---

Specific region for size estimate 4

---

Method for size estimate 4

- Service Multiplier
- Unique object multiplier
- Capture-recapture
- Network scale-up
- Wisdom of the crowds
- Delphi
- Program estimate
- General population survey
- Mapping and enumeration
- Reverse tracking method
- Literature Review
- Other

Notes

\_\_\_\_\_

**VIOLENCE**

Violence denominator

\_\_\_\_\_

Number experienced physical violence

\_\_\_\_\_

(FSW)

Number experienced physical violence, lower bound of CI - calculated

\_\_\_\_\_

(FSW)

Number experienced physical violence, upper bound of CI - calculated

\_\_\_\_\_

(FSW)

Number experienced sexual violence

\_\_\_\_\_

(FSW)

Number experienced sexual violence, lower bound of CI - calculated

\_\_\_\_\_

(FSW)

Number experienced sexual violence, upper bound of CI - calculated

\_\_\_\_\_

(FSW)

Number experienced intimate partner violence

\_\_\_\_\_

(FSW)

Number experienced intimate partner violence, lower bound of CI - calculated

\_\_\_\_\_

(FSW)

Number experienced intimate partner violence, upper bound of CI - calculated

\_\_\_\_\_

(FSW)

---

---

**FSW SPECIFIC INDICATORS**

FSW specific variables denominator

\_\_\_\_\_

Number who have consistent condom use

\_\_\_\_\_

(FSW)

Number who have consistent condom use, lower bound of CI - calculated

\_\_\_\_\_

(FSW)

Number who have consistent condom use, upper bound of CI - calculated

\_\_\_\_\_

(FSW)

Consistent condom use - method

\_\_\_\_\_

(FSW)

Number denied health services

\_\_\_\_\_

(FSW)

Number denied health services, lower bound of CI -  
calculated

---

(FSW)

Number denied health services, upper bound of CI -  
calculated

---

(FSW)

Number afraid to seek health services

---

(FSW)

Number afraid to seek health services, lower bound of  
CI - calculated

---

(FSW)

Number afraid to seek health services, upper bound of  
CI - calculated

---

(FSW)

---

---

**MEN WHO HAVE SEX WITH MEN**

Sample size of MSM \_\_\_\_\_

---

---

**BURDEN OF HIV (MSM)**

Prevalence of HIV in sample (count)  
(MSM) \_\_\_\_\_

Prevalence, lower bound of CI - reported \_\_\_\_\_

(MSM)

Prevalence, upper bound of CI - reported \_\_\_\_\_

(MSM)

Prevalence, lower bound of CI - calculated \_\_\_\_\_

(MSM)

Prevalence, upper bound of CI - calculated \_\_\_\_\_

(MSM)

Incidence of HIV in sample (count) \_\_\_\_\_

(MSM)

Incidence, lower bound of CI - reported \_\_\_\_\_

(MSM)

Incidence, upper bound of CI - reported \_\_\_\_\_

(MSM)

Incidence, lower bound of CI - calculated \_\_\_\_\_

(MSM)

Incidence, upper bound of CI - calculated \_\_\_\_\_

(MSM)

Notes, burden of disease

(MSM)

---

---

---

**HIV PREVENTION CASCADE**

Prevention cascade denominator (number of HIV negative)

---

Number of HIV negative individuals tested for HIV

---

(MSM)

Number of HIV negative individuals tested for HIV, lower bound of CI - calculated

---

(MSM)

Number of HIV negative individuals tested for HIV, upper bound of CI - calculated

---

(MSM)

Number tested negative

---

(MSM)

Number tested negative, lower bound of CI - calculated

---

(MSM)

Number tested negative, upper bound of CI - calculated

---

(MSM)

Number with knowledge of HIV prevention

---

(MSM)

Number with knowledge of HIV prevention, lower bound of CI - calculated

---

(MSM)

Number with knowledge of HIV prevention, upper bound of CI - calculated

---

(MSM)

Number who report condom availability

---

(MSM)

Number who report condom availability, lower bound of CI - calculated

---

(MSM)

Number who report condom availability, upper bound of CI - calculated

---

(MSM)

Number who report PrEP availability

---

(MSM)

Number who report PrEP availability, lower bound of CI - calculated

---

(MSM)

Number who report PrEP availability, upper bound of CI - calculated

---

(MSM)

Notes, prevention cascade

---

(MSM)

---

---

**HIV TREATMENT CASCADE**

Treatment cascade denominator \_\_\_\_\_

Number tested (ever) \_\_\_\_\_

(MSM)

Number tested (ever), lower bound of CI - calculated \_\_\_\_\_

(MSM)

Number tested (ever), upper bound of CI - calculated \_\_\_\_\_

(MSM)

Number tested in last 12 months \_\_\_\_\_

(MSM)

Number tested in last 12 months, lower bound of CI -  
calculated \_\_\_\_\_

(MSM)

Number tested in last 12 months, upper bound of CI -  
calculated \_\_\_\_\_

(MSM)

Number previously diagnosed \_\_\_\_\_

(MSM)

Number previously diagnosed, lower bound of CI -  
calculated \_\_\_\_\_

(MSM)

Number previously diagnosed, upper bound of CI -  
calculated \_\_\_\_\_

(MSM)

Number linked to HIV care \_\_\_\_\_

(MSM)



Number linked to HIV care, lower bound of CI -  
calculated

---

(MSM)

Number linked to HIV care, upper bound of CI -  
calculated

---

(MSM)

Number retained in care

---

(MSM)

Number retained in care, lower bound of CI -  
calculated

---

(MSM)

Number retained in care, upper bound of CI -  
calculated

---

(MSM)

Number on treatment

---

(MSM)

Number on treatment, lower bound of CI - calculated

---

(MSM)

Number on treatment, upper bound of CI - calculated

---

(MSM)

Number adherent/undetectable

---

(MSM)

Number adherent/undetectable, lower bound of CI -  
calculated

---

(MSM)

Number adherent/undetectable, upper bound of CI -  
calculated

---

(MSM)

Notes, treatment cascade

---

(MSM)

---

---

**POPULATION SIZE ESTIMATES**

Size estimate 1

---

(MSM)

Size estimate MSM, lower bound of CI 1

---

Size estimate MSM, upper bound of CI 1

---

Specific region for size estimate 1

---

Method for size estimate 1

- Service Multiplier
- Unique object multiplier
- Capture-recapture
- Network scale-up
- Wisdom of the crowds
- Delphi
- Program estimate
- General population survey
- Mapping and enumeration
- Reverse tracking method
- Literature Review
- Other

Size estimate 2

---

(MSM)

Size estimate MSM, lower bound of CI 2

---

Size estimate MSM, upper bound of CI 2

---

Specific region for size estimate 2

---

Method for size estimate 2

- Service Multiplier
- Unique object multiplier
- Capture-recapture
- Network scale-up
- Wisdom of the crowds
- Delphi
- Program estimate
- General population survey
- Mapping and enumeration
- Reverse tracking method
- Literature Review
- Other

Size estimate 3

\_\_\_\_\_

(MSM)

Size estimate MSM, lower bound of CI 3

\_\_\_\_\_

Size estimate MSM, upper bound of CI 3

\_\_\_\_\_

Specific region for size estimate 3

\_\_\_\_\_

Method for size estimate 3

- Service Multiplier
- Unique object multiplier
- Capture-recapture
- Network scale-up
- Wisdom of the crowds
- Delphi
- Program estimate
- General population survey
- Mapping and enumeration
- Reverse tracking method
- Literature Review
- Other

Size estimate 4

\_\_\_\_\_

(MSM)

Size estimate MSM, lower bound of CI 4

\_\_\_\_\_

Size estimate MSM, upper bound of CI 4

\_\_\_\_\_

Specific region for size estimate 4

\_\_\_\_\_

Method for size estimate 4

- Service Multiplier
- Unique object multiplier
- Capture-recapture
- Network scale-up
- Wisdom of the crowds
- Delphi
- Program estimate
- General population survey
- Mapping and enumeration
- Reverse tracking method
- Literature Review
- Other

Notes

\_\_\_\_\_

---

---

**VIOLENCE**

Violence denominator \_\_\_\_\_

Number experienced physical violence \_\_\_\_\_

(MSM)

Number experienced physical violence, lower bound of CI - calculated \_\_\_\_\_

(MSM)

Number experienced physical violence, upper bound of CI - calculated \_\_\_\_\_

(MSM)

Number experienced sexual violence \_\_\_\_\_

(MSM)

Number experienced sexual violence, lower bound of CI - calculated \_\_\_\_\_

(MSM)

Number experienced sexual violence, upper bound of CI - calculated \_\_\_\_\_

(MSM)

Number experienced intimate partner violence \_\_\_\_\_

(MSM)

Number experienced intimate partner violence, lower bound of CI - calculated \_\_\_\_\_

(MSM)

Number experienced intimate partner violence, upper bound of CI - calculated \_\_\_\_\_

(MSM)

---

---

**MSM SPECIFIC INDICATORS**

MSM specific variables denominator \_\_\_\_\_

Number who have consistent condom use \_\_\_\_\_

(MSM)

Number who have consistent condom use, lower bound of CI - calculated \_\_\_\_\_

(MSM)

Number who have consistent condom use, upper bound of CI - calculated \_\_\_\_\_

(MSM)

Consistent condom use - method \_\_\_\_\_

(MSM)

Number denied health services \_\_\_\_\_

(MSM)

Number denied health services, lower bound of CI - calculated \_\_\_\_\_

(MSM)

Number denied health services, upper bound of CI - calculated \_\_\_\_\_

(MSM)

Number afraid to seek health services \_\_\_\_\_

(MSM)

Number afraid to seek health services, lower bound of CI - calculated \_\_\_\_\_

(MSM)

Number afraid to seek health services, upper bound of CI - calculated \_\_\_\_\_

(MSM)

---

---

**PEOPLE WHO USE DRUGS**

Sample size of PWUD \_\_\_\_\_

---

---

**BURDEN OF HIV (PWUD)**

Prevalence of HIV in sample (count) \_\_\_\_\_

(PWUD)

Prevalence, lower bound of CI - reported \_\_\_\_\_

(PWUD)

Prevalence, upper bound of CI - reported \_\_\_\_\_

(PWUD)

Prevalence, lower bound of CI - calculated \_\_\_\_\_

(PWUD)

Prevalence, upper bound of CI - calculated \_\_\_\_\_

(PWUD)

Incidence of HIV in sample (count) \_\_\_\_\_

(PWUD)

Incidence, lower bound of CI - reported \_\_\_\_\_

(PWUD)

Incidence, upper bound of CI - reported \_\_\_\_\_

(PWUD)

Incidence, lower bound of CI - calculated \_\_\_\_\_

(PWUD)

Incidence, upper bound of CI - calculated \_\_\_\_\_

(PWUD)

Notes, burden of disease \_\_\_\_\_

(PWUD)

---

---

**HIV PREVENTION CASCADE**

Prevention cascade denominator (number of HIV negative) \_\_\_\_\_

Number of HIV negative individuals tested for HIV \_\_\_\_\_

(PWUD)

Number of HIV negative individuals tested for HIV, lower bound of CI - calculated \_\_\_\_\_

(PWUD)

Number of HIV negative individuals tested for HIV, upper bound of CI - calculated \_\_\_\_\_

(PWUD)

Number tested negative \_\_\_\_\_

(PWUD)

Number tested negative, lower bound of CI -  
calculated \_\_\_\_\_

(PWUD)

Number tested negative, upper bound of CI -  
calculated \_\_\_\_\_

(PWUD)

Number with knowledge of HIV prevention \_\_\_\_\_

(PWUD)

Number with knowledge of HIV prevention, lower bound  
of CI - calculated \_\_\_\_\_

(PWUD)

Number with knowledge of HIV prevention, upper bound  
of CI - calculated \_\_\_\_\_

(PWUD)

Number who report condom availability \_\_\_\_\_

(PWUD)

Number who report condom availability, lower bound of  
CI - calculated \_\_\_\_\_

(PWUD)

Number who report condom availability, upper bound of  
CI - calculated \_\_\_\_\_

(PWUD)

Number who report PrEP availability \_\_\_\_\_

(PWUD)

Number who report PrEP availability, lower bound of  
CI - calculated \_\_\_\_\_

(PWUD)



Number who report PrEP availability, upper bound of CI - calculated

\_\_\_\_\_

(PWUD)

Notes, prevention cascade

\_\_\_\_\_

(PWUD)

---

---

**HIV TREATMENT CASCADE**

Treatment cascade denominator

\_\_\_\_\_

Number tested (ever)

\_\_\_\_\_

(PWUD)

Number tested (ever), lower bound of CI - calculated

\_\_\_\_\_

(PWUD)

Number tested (ever), upper bound of CI - calculated

\_\_\_\_\_

(PWUD)

Number tested in last 12 months

\_\_\_\_\_

(PWUD)

Number tested in last 12 months, lower bound of CI - calculated

\_\_\_\_\_

(PWUD)

Number tested in last 12 months, upper bound of CI - calculated

\_\_\_\_\_

(PWUD)

Number previously diagnosed

\_\_\_\_\_

(PWUD)

Number previously diagnosed, lower bound of CI -  
calculated

---

(PWUD)

Number previously diagnosed, upper bound of CI -  
calculated

---

(PWUD)

Number linked to HIV care

---

(PWUD)

Number linked to HIV care, lower bound of CI -  
calculated

---

(PWUD)

Number linked to HIV care, upper bound of CI -  
calculated

---

(PWUD)

Number retained in care

---

(PWUD)

Number retained in care, lower bound of CI -  
calculated

---

(PWUD)

Number retained in care, upper bound of CI -  
calculated

---

(PWUD)

Number on treatment

---

(PWUD)

Number on treatment, lower bound of CI - calculated

---

(PWUD)

Number on treatment, upper bound of CI - calculated

---

(PWUD)

Number adherent/undetectable

---

(PWUD)

Number adherent/undetectable, lower bound of CI - calculated

---

(PWUD)

Number adherent/undetectable, upper bound of CI - calculated

---

(PWUD)

Notes, treatment cascade

---

(PWUD)

---

---

**POPULATION SIZE ESTIMATES**

Size estimate 1

---

(PWUD)

Size estimate PWUD, lower bound of CI 1

---

Size estimate PWUD, upper bound of CI 1

---

Specific region for size estimate 1

---

Method for size estimate 1

- Service Multiplier
- Unique object multiplier
- Capture-recapture
- Network scale-up
- Wisdom of the crowds
- Delphi
- Program estimate
- General population survey
- Mapping and enumeration
- Reverse tracking method
- Literature Review
- Other

Size estimate 2

---

(PWUD)

Size estimate PWUD, lower bound of CI 2

---

Size estimate PWUD, upper bound of CI 2

---

Specific region for size estimate 2

---

Method for size estimate 2

- Service Multiplier
- Unique object multiplier
- Capture-recapture
- Network scale-up
- Wisdom of the crowds
- Delphi
- Program estimate
- General population survey
- Mapping and enumeration
- Reverse tracking method
- Literature Review
- Other

Size estimate 3

---

(PWUD)

Size estimate PWUD, lower bound of CI 3

---

Size estimate PWUD, upper bound of CI 3

---

Specific region for size estimate 3

---

Method for size estimate 3

- Service Multiplier
- Unique object multiplier
- Capture-recapture
- Network scale-up
- Wisdom of the crowds
- Delphi
- Program estimate
- General population survey
- Mapping and enumeration
- Reverse tracking method
- Literature Review
- Other

Size estimate 4

---

(PWUD)

Size estimate PWUD, lower bound of CI 4

---

Size estimate PWUD, upper bound of CI 4

---

Specific region for size estimate 4

---

Method for size estimate 4

- Service Multiplier
- Unique object multiplier
- Capture-recapture
- Network scale-up
- Wisdom of the crowds
- Delphi
- Program estimate
- General population survey
- Mapping and enumeration
- Reverse tracking method
- Literature Review
- Other

Notes

\_\_\_\_\_

**VIOLENCE**

Violence denominator

\_\_\_\_\_

Number experienced physical violence

\_\_\_\_\_

(PWUD)

Number experienced physical violence, lower bound of CI - calculated

\_\_\_\_\_

(PWUD)

Number experienced physical violence, upper bound of CI - calculated

\_\_\_\_\_

(PWUD)

Number experienced sexual violence

\_\_\_\_\_

(PWUD)

Number experienced sexual violence, lower bound of CI - calculated

\_\_\_\_\_

(PWUD)

Number experienced sexual violence, upper bound of CI - calculated

\_\_\_\_\_

(PWUD)

Number experienced intimate partner violence

\_\_\_\_\_

(PWUD)

Number experienced intimate partner violence, lower bound of CI - calculated \_\_\_\_\_

(PWUD)

Number experienced intimate partner violence, upper bound of CI - calculated \_\_\_\_\_

(PWUD)

---

---

**PWUD SPECIFIC INDICATORS**

PWUD specific variables denominator \_\_\_\_\_

Number who have consistent condom use \_\_\_\_\_

(PWUD)

Number who have consistent condom use, lower bound of CI - calculated \_\_\_\_\_

(PWUD)

Number who have consistent condom use, upper bound of CI - calculated \_\_\_\_\_

(PWUD)

Consistent condom use - method \_\_\_\_\_

(PWUD)

Number denied health services \_\_\_\_\_

(PWUD)

Number denied health services, lower bound of CI -  
calculated

---

(PWUD)

Number denied health services, upper bound of CI -  
calculated

---

(PWUD)

Number afraid to seek health services

---

(PWUD)

Number afraid to seek health services, lower bound of  
CI - calculated

---

(PWUD)

Number afraid to seek health services, upper bound of  
CI - calculated

---

(PWUD)

Number of needles per injector

---

(PWUD)

Number of needles per injector, lower bound of CI -  
calculated

\_\_\_\_\_

(PWUD)

Number of needles per injector, upper bound of CI -  
calculated

\_\_\_\_\_

(PWUD)

---

---

**TRANSGENDER PEOPLE**

Sample size of Transgender

\_\_\_\_\_

---

---

**BURDEN OF HIV (Trans)**

Prevalence of HIV in sample (count)

\_\_\_\_\_

(Trans)

Prevalence, lower bound of CI - reported

\_\_\_\_\_

(Trans)

Prevalence, upper bound of CI - reported

\_\_\_\_\_

(Trans)

Prevalence, lower bound of CI - calculated

\_\_\_\_\_

(Trans)

Prevalence, upper bound of CI - calculated

\_\_\_\_\_

(Trans)

Incidence of HIV in sample (count)

\_\_\_\_\_

(Trans)



Incidence, lower bound of CI - reported \_\_\_\_\_  
(Trans)

Incidence, upper bound of CI - reported \_\_\_\_\_  
(Trans)

Incidence, lower bound of CI - calculated \_\_\_\_\_  
(Trans)

Incidence, upper bound of CI - calculated \_\_\_\_\_  
(Trans)

Notes, burden of disease \_\_\_\_\_  
(Trans)

---

---

**HIV PREVENTION CASCADE**

Prevention cascade denominator (number of HIV negative) \_\_\_\_\_

Number of HIV negative individuals tested for HIV \_\_\_\_\_  
(Trans)

Number of HIV negative individuals tested for HIV, lower bound of CI - calculated \_\_\_\_\_  
(Trans)

Number of HIV negative individuals tested for HIV, upper bound of CI - calculated \_\_\_\_\_  
(Trans)

Number tested negative \_\_\_\_\_  
(Trans)

Number tested negative, lower bound of CI - calculated \_\_\_\_\_  
(Trans)

Number tested negative, upper bound of CI -  
calculated \_\_\_\_\_

(Trans)

Number with knowledge of HIV prevention \_\_\_\_\_

(Trans)

Number with knowledge of HIV prevention, lower bound  
of CI - calculated \_\_\_\_\_

(Trans)

Number with knowledge of HIV prevention, upper bound  
of CI - calculated \_\_\_\_\_

(Trans)

Number who report condom availability \_\_\_\_\_

(Trans)

Number who report condom availability, lower bound of  
CI - calculated \_\_\_\_\_

(Trans)

Number who report condom availability, upper bound of  
CI - calculated \_\_\_\_\_

(Trans)

Number who report PrEP availability \_\_\_\_\_

(Trans)

Number who report PrEP availability, lower bound of  
CI - calculated \_\_\_\_\_

(Trans)

Number who report PrEP availability, upper bound of  
CI - calculated \_\_\_\_\_

(Trans)

Notes, prevention cascade

---

(Trans)

---

---

**HIV TREATMENT CASCADE**

Treatment cascade denominator

---

Number tested (ever)

---

(Trans)

Number tested (ever), lower bound of CI - calculated

---

(Trans)

Number tested (ever), upper bound of CI - calculated

---

(Trans)

Number tested in last 12 months

---

(Trans)

Number tested in last 12 months, lower bound of CI - calculated

---

(Trans)

Number tested in last 12 months, upper bound of CI - calculated

---

(Trans)

Number previously diagnosed

---

(Trans)

Number previously diagnosed, lower bound of CI - calculated

---

(Trans)

Number previously diagnosed, upper bound of CI -  
calculated

---

(Trans)

Number linked to HIV care

---

(Trans)

Number linked to HIV care, lower bound of CI -  
calculated

---

(Trans)

Number linked to HIV care, upper bound of CI -  
calculated

---

(Trans)

Number retained in care

---

(Trans)

Number retained in care, lower bound of CI -  
calculated

---

(Trans)

Number retained in care, upper bound of CI -  
calculated

---

(Trans)

Number on treatment

---

(Trans)

Number on treatment, lower bound of CI - calculated

---

(Trans)

Number on treatment, upper bound of CI - calculated

---

(Trans)

Number adherent/undetectable

---

(Trans)

Number adherent/undetectable, lower bound of CI -  
calculated

\_\_\_\_\_

(Trans)

Number adherent/undetectable, upper bound of CI -  
calculated

\_\_\_\_\_

(Trans)

Notes, treatment cascade

\_\_\_\_\_

(Trans)

---

---

**POPULATION SIZE ESTIMATES**

Size estimate 1

\_\_\_\_\_

(Trans)

Size estimate Trans, lower bound of CI 1

\_\_\_\_\_

Size estimate Trans, upper bound of CI 1

\_\_\_\_\_

Specific region for size estimate 1

\_\_\_\_\_

Method for size estimate 1

- Service Multiplier
- Unique object multiplier
- Capture-recapture
- Network scale-up
- Wisdom of the crowds
- Delphi
- Program estimate
- General population survey
- Mapping and enumeration
- Reverse tracking method
- Literature Review
- Other

Size estimate 2

\_\_\_\_\_

(Trans)

Size estimate Trans, lower bound of CI 2

\_\_\_\_\_

Size estimate Trans, upper bound of CI 2

\_\_\_\_\_

Specific region for size estimate 2

\_\_\_\_\_

Method for size estimate 2

- Service Multiplier
- Unique object multiplier
- Capture-recapture
- Network scale-up
- Wisdom of the crowds
- Delphi
- Program estimate
- General population survey
- Mapping and enumeration
- Reverse tracking method
- Literature Review
- Other

Size estimate 3

\_\_\_\_\_

(Trans)

Size estimate Trans, lower bound of CI 3

\_\_\_\_\_

Size estimate Trans, upper bound of CI 3

\_\_\_\_\_

Specific region for size estimate 3

\_\_\_\_\_

Method for size estimate 3

- Service Multiplier
- Unique object multiplier
- Capture-recapture
- Network scale-up
- Wisdom of the crowds
- Delphi
- Program estimate
- General population survey
- Mapping and enumeration
- Reverse tracking method
- Literature Review
- Other

Size estimate 4

\_\_\_\_\_

(Trans)

Size estimate Trans, lower bound of CI 4

\_\_\_\_\_

Size estimate Trans, upper bound of CI 4

\_\_\_\_\_

Specific region for size estimate 4

\_\_\_\_\_

Method for size estimate 4

- Service Multiplier
- Unique object multiplier
- Capture-recapture
- Network scale-up
- Wisdom of the crowds
- Delphi
- Program estimate
- General population survey
- Mapping and enumeration
- Reverse tracking method
- Literature Review
- Other

Notes

\_\_\_\_\_

---

---

**VIOLENCE**

Violence denominator \_\_\_\_\_

Number experienced physical violence \_\_\_\_\_

(Trans)

Number experienced physical violence, lower bound of CI - calculated \_\_\_\_\_

(Trans)

Number experienced physical violence, upper bound of CI - calculated \_\_\_\_\_

(Trans)

Number experienced sexual violence \_\_\_\_\_

(Trans)

Number experienced sexual violence, lower bound of CI - calculated \_\_\_\_\_

(Trans)

Number experienced sexual violence, upper bound of CI - calculated \_\_\_\_\_

(Trans)

Number experienced intimate partner violence \_\_\_\_\_

(Trans)

Number experienced intimate partner violence, lower bound of CI - calculated \_\_\_\_\_

(Trans)

Number experienced intimate partner violence, upper bound of CI - calculated \_\_\_\_\_

(Trans)

---

---

**Trans SPECIFIC INDICATORS**

Trans specific variables denominator \_\_\_\_\_

Number who have consistent condom use \_\_\_\_\_

(Trans)

Number who have consistent condom use, lower bound of CI - calculated \_\_\_\_\_

(Trans)

Number who have consistent condom use, upper bound of CI - calculated \_\_\_\_\_

(Trans)

Consistent condom use - method \_\_\_\_\_

(Trans)

Number denied health services \_\_\_\_\_

(Trans)

Number denied health services, lower bound of CI - calculated \_\_\_\_\_

(Trans)

Number denied health services, upper bound of CI - calculated \_\_\_\_\_

(Trans)



Number afraid to seek health services \_\_\_\_\_

(Trans)

Number afraid to seek health services, lower bound of CI - calculated \_\_\_\_\_

(Trans)

Number afraid to seek health services, upper bound of CI - calculated \_\_\_\_\_

(Trans)

---

---

**INCARCERATE PEOPLE**

Sample size of incarcerated \_\_\_\_\_

---

---

**BURDEN OF HIV (incarcerated)**

Prevalence of HIV in sample (count) \_\_\_\_\_

(incarcerated)

Prevalence, lower bound of CI - reported \_\_\_\_\_

(incarcerated)

Prevalence, upper bound of CI - reported \_\_\_\_\_

(incarcerated)

Prevalence, lower bound of CI - calculated \_\_\_\_\_

(incarcerated)

Prevalence, upper bound of CI - calculated \_\_\_\_\_

(incarcerated)

Incidence of HIV in sample (count) \_\_\_\_\_

(incarcerated)

Incidence, lower bound of CI - reported \_\_\_\_\_

(incarcerated)

Incidence, upper bound of CI - reported \_\_\_\_\_

(incarcerated)

Incidence, lower bound of CI - calculated \_\_\_\_\_

(incarcerated)

Incidence, upper bound of CI - calculated \_\_\_\_\_

(incarcerated)

Notes, burden of disease \_\_\_\_\_

(incarcerated)

---

---

**HIV PREVENTION CASCADE**

Prevention cascade denominator (number of HIV negative) \_\_\_\_\_

Number of HIV negative individuals tested for HIV \_\_\_\_\_

(incarcerated)

Number of HIV negative individuals tested for HIV, lower bound of CI - calculated \_\_\_\_\_

(incarcerated)

Number of HIV negative individuals tested for HIV, upper bound of CI - calculated \_\_\_\_\_

(incarcerated)

Number tested negative \_\_\_\_\_  
(incarcerated)

Number tested negative, lower bound of CI -  
calculated \_\_\_\_\_  
(incarcerated)

Number tested negative, upper bound of CI -  
calculated \_\_\_\_\_  
(incarcerated)

Number with knowledge of HIV prevention \_\_\_\_\_  
(incarcerated)

Number with knowledge of HIV prevention, lower bound  
of CI - calculated \_\_\_\_\_  
(incarcerated)

Number with knowledge of HIV prevention, upper bound  
of CI - calculated \_\_\_\_\_  
(incarcerated)

Number who report condom availability \_\_\_\_\_  
(incarcerated)

Number who report condom availability, lower bound of  
CI - calculated \_\_\_\_\_  
(incarcerated)

Number who report condom availability, upper bound of  
CI - calculated \_\_\_\_\_  
(incarcerated)

Number who report PrEP availability \_\_\_\_\_  
(incarcerated)

Number who report PrEP availability, lower bound of  
CI - calculated \_\_\_\_\_  
(incarcerated)

Number who report PrEP availability, upper bound of CI - calculated

\_\_\_\_\_

(incarcerated)

Notes, prevention cascade

\_\_\_\_\_

(incarcerated)

---

---

**HIV TREATMENT CASCADE**

Treatment cascade denominator

\_\_\_\_\_

Number tested (ever)

\_\_\_\_\_

(incarcerated)

Number tested (ever), lower bound of CI - calculated

\_\_\_\_\_

(incarcerated)

Number tested (ever), upper bound of CI - calculated

\_\_\_\_\_

(incarcerated)

Number tested in last 12 months

\_\_\_\_\_

(incarcerated)

Number tested in last 12 months, lower bound of CI - calculated

\_\_\_\_\_

(incarcerated)

Number tested in last 12 months, upper bound of CI - calculated

\_\_\_\_\_

(incarcerated)

Number previously diagnosed

\_\_\_\_\_

(incarcerated)

Number previously diagnosed, lower bound of CI -  
calculated

---

(incarcerated)

Number previously diagnosed, upper bound of CI -  
calculated

---

(incarcerated)

Number linked to HIV care

---

(incarcerated)

Number linked to HIV care, lower bound of CI -  
calculated

---

(incarcerated)

Number linked to HIV care, upper bound of CI -  
calculated

---

(incarcerated)

Number retained in care

---

(incarcerated)

Number retained in care, lower bound of CI -  
calculated

---

(incarcerated)

Number retained in care, upper bound of CI -  
calculated

---

(incarcerated)

Number on treatment

---

(incarcerated)

Number on treatment, lower bound of CI - calculated

---

(incarcerated)

Number on treatment, upper bound of CI - calculated

---

(incarcerated)

Number adherent/undetectable

---

(incarcerated)

Number adherent/undetectable, lower bound of CI - calculated

---

(incarcerated)

Number adherent/undetectable, upper bound of CI - calculated

---

(incarcerated)

Notes, treatment cascade

---

(incarcerated)

---

---

**POPULATION SIZE ESTIMATES**

Size estimate 1

---

(incarcerated)

Size estimate incarcerated, lower bound of CI 1

---

Size estimate incarcerated, upper bound of CI 1

---

Specific region for size estimate 1

---

Method for size estimate 1

- Service Multiplier
- Unique object multiplier
- Capture-recapture
- Network scale-up
- Wisdom of the crowds
- Delphi
- Program estimate
- General population survey
- Mapping and enumeration
- Reverse tracking method
- Literature Review
- Other

Size estimate 2 \_\_\_\_\_  
 (incarcerated)  
 Size estimate incarcerated, lower bound of CI 2 \_\_\_\_\_  
 Size estimate incarcerated, upper bound of CI 2 \_\_\_\_\_  
 Specific region for size estimate 2 \_\_\_\_\_

Method for size estimate 2

- Service Multiplier
- Unique object multiplier
- Capture-recapture
- Network scale-up
- Wisdom of the crowds
- Delphi
- Program estimate
- General population survey
- Mapping and enumeration
- Reverse tracking method
- Literature Review
- Other

Size estimate 3 \_\_\_\_\_  
 (incarcerated)  
 Size estimate incarcerated, lower bound of CI 3 \_\_\_\_\_  
 Size estimate incarcerated, upper bound of CI 3 \_\_\_\_\_  
 Specific region for size estimate 3 \_\_\_\_\_

Method for size estimate 3

- Service Multiplier
- Unique object multiplier
- Capture-recapture
- Network scale-up
- Wisdom of the crowds
- Delphi
- Program estimate
- General population survey
- Mapping and enumeration
- Reverse tracking method
- Literature Review
- Other

Size estimate 4 \_\_\_\_\_  
 (incarcerated)  
 Size estimate incarcerated, lower bound of CI 4 \_\_\_\_\_  
 Size estimate incarcerated, upper bound of CI 4 \_\_\_\_\_  
 Specific region for size estimate 4 \_\_\_\_\_

Method for size estimate 4

- Service Multiplier
- Unique object multiplier
- Capture-recapture
- Network scale-up
- Wisdom of the crowds
- Delphi
- Program estimate
- General population survey
- Mapping and enumeration
- Reverse tracking method
- Literature Review
- Other

Notes

\_\_\_\_\_

**VIOLENCE**

Violence denominator

\_\_\_\_\_

Number experienced physical violence

\_\_\_\_\_

(incarcerated)

Number experienced physical violence, lower bound of CI - calculated

\_\_\_\_\_

(incarcerated)

Number experienced physical violence, upper bound of CI - calculated

\_\_\_\_\_

(incarcerated)

Number experienced sexual violence

\_\_\_\_\_

(incarcerated)

Number experienced sexual violence, lower bound of CI - calculated

\_\_\_\_\_

(incarcerated)

Number experienced sexual violence, upper bound of CI - calculated

\_\_\_\_\_

(incarcerated)

Number experienced intimate partner violence

\_\_\_\_\_

(incarcerated)



Number experienced intimate partner violence, lower bound of CI - calculated \_\_\_\_\_

(incarcerated)

Number experienced intimate partner violence, upper bound of CI - calculated \_\_\_\_\_

(incarcerated)

---

---

**incarcerated SPECIFIC INDICATORS**

incarcerated specific variables denominator \_\_\_\_\_

Number who have consistent condom use \_\_\_\_\_

(incarcerated)

Number who have consistent condom use, lower bound of CI - calculated \_\_\_\_\_

(incarcerated)

Number who have consistent condom use, upper bound of CI - calculated \_\_\_\_\_

(incarcerated)

Consistent condom use - method \_\_\_\_\_

(incarcerated)

Number denied health services \_\_\_\_\_

(incarcerated)

Number denied health services, lower bound of CI -  
calculated

---

(incarcerated)

Number denied health services, upper bound of CI -  
calculated

---

(incarcerated)

Number afraid to seek health services

---

(incarcerated)

Number afraid to seek health services, lower bound of  
CI - calculated

---

(incarcerated)

Number afraid to seek health services, upper bound of  
CI - calculated

---

(incarcerated)
